# Supplementary figures and images for: Regional differentiation of felid vertebral column evolution: a study of 3D shape trajectories
Source: Springer Nature journal article supplement (doi:10.1007/s13127-016-0304-4), 2016-10-24

Figure S1:

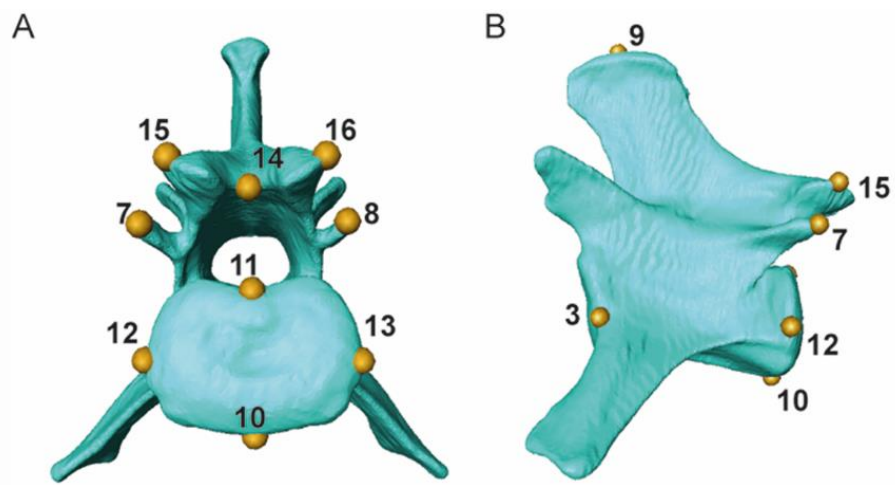

Figure S2:

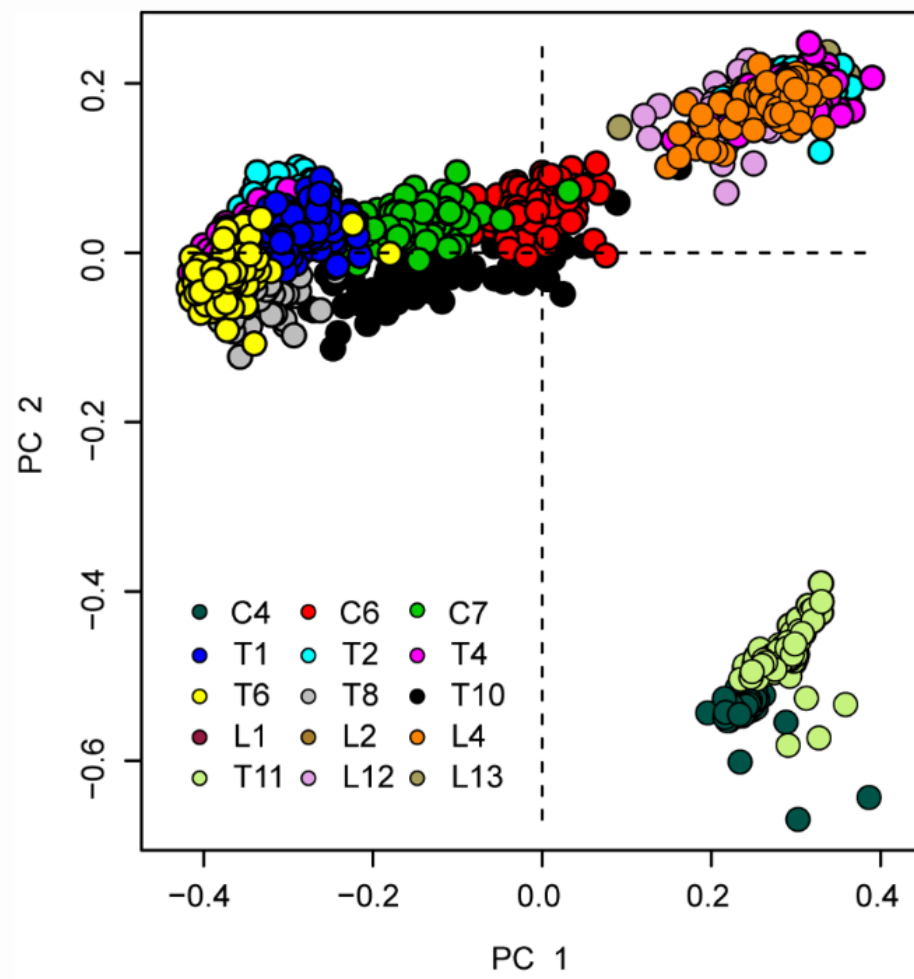

Supplement: 13127_2016_304_MOESM1_ESM.pdf [file 13127_2016_304_MOESM1_ESM.pdf]
